# Supplementary material for: APOE2 orchestrated differences in transcriptomic and lipidomic profiles of postmortem AD brain
Source: PubMed Central journal article supplement (PMC6937981; doi:10.1186/s13195-019-0558-0), 2019-12-30
Supplement: 13195_2019_558_MOESM5_ESM.pdf [file 13195_2019_558_MOESM5_ESM.pdf]

## Phosphatidylethanolamine (PE)

| m/z     | lipid species                    |
|---------|----------------------------------|
| 920.51  | P16:0-18:2                       |
| 922.53  | P18:1-16:0/P16:0-18:1            |
| 924.54  | P18:0-16:0/P16:0-18:0            |
| 936.51  | D16:0-18:2/D16:1-18:1            |
| 938.52  | D16:0-18:1                       |
| 944.51  | P16:0-20:4                       |
| 946.53  | P16:0-20:3/P18:1-18:2            |
| 948.54  | P18:1-18:1/P18:0-18:2/P16:0-20:2 |
| 950.56  | P18:0-18:1/P16:0-20:1            |
| 962.52  | D18:1-18:2/D16:0-20:3            |
| 964.54  | D18:0-18:2/D18:1-18:1/D16:0-20:2 |
| 966.55  | D18:0-18:1/D16:0-20:1            |
| 968.51  | P16:0-22:6/D18:0-18:0/P18:2-20:4 |
| 970.53  | P18:1-20:4/P16:0-22:5            |
| 972.54  | P18:0-20:4/P16:0-22:4/P18:1-20:3 |
| 974.56  | P18:0-20:3                       |
| 976.58  | P20:1-18:1/P18:1-20:1            |
| 984.51  | D16:0-22:6                       |
| 986.52  | D18:1-20:4D/16:0-22:5            |
| 988.54  | D18:0-20:4/D16:0-22:4            |
| 990.55  | D18:0-20:3/D18:1-20:2/D16:0-22:3 |
| 994.53  | P18:1-22:6/D18:0-20:1            |
| 996.54  | P18:0-22:6/P18:1-22:5/D18:0-20:0 |
| 998.56  | P18:0-22:5/P18:1-22:4            |
| 1000.58 | P18:0-22:4/P20:0-20:4/P18:1-22:3 |
| 1002.59 | A20:0-20:4/P18:0-22:3            |
| 1010.52 | D18:1-22:6                       |
| 1012.54 | D18:0-22:6/D18:1-22:5            |
| 1014.55 | D18:0-22:5/D18:1-22:4            |
| 1016.57 | D20:0-20:4/D18:0-22:4            |

Suppl Table 5 - Lipids
