# Supplementary material for: APOE2 orchestrated differences in transcriptomic and lipidomic profiles of postmortem AD brain
Source: PubMed Central journal article supplement (PMC6937981; doi:10.1186/s13195-019-0558-0), 2019-12-30
Supplement: 13195_2019_558_MOESM6_ESM.pdf [file 13195_2019_558_MOESM6_ESM.pdf]

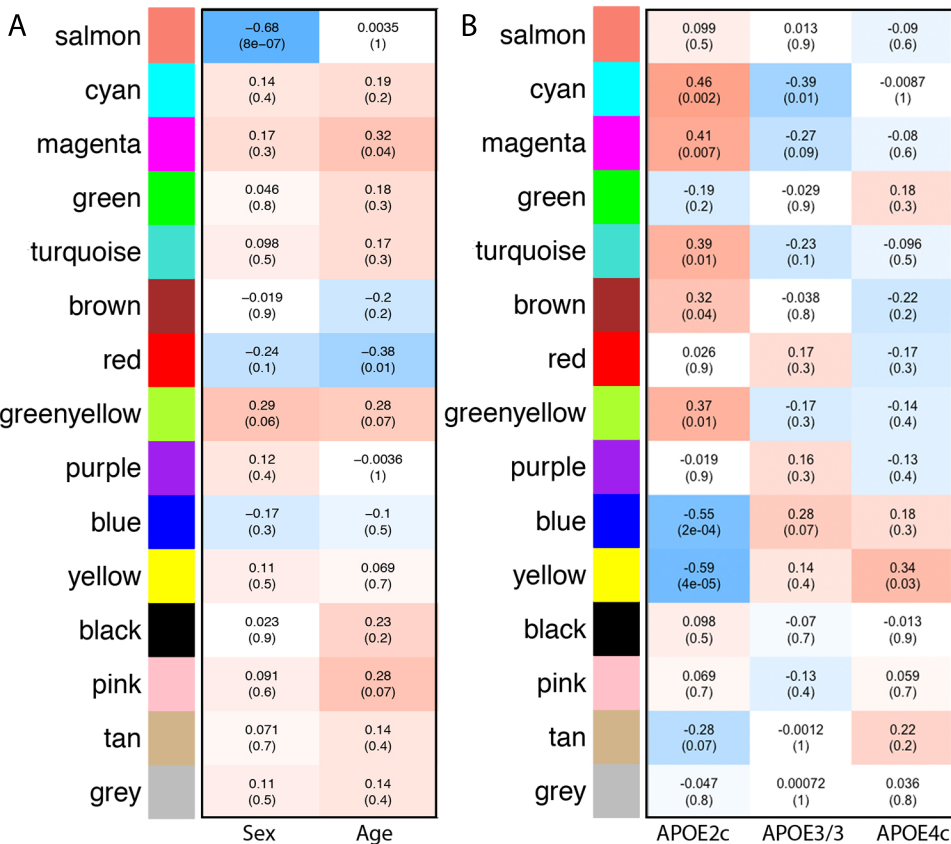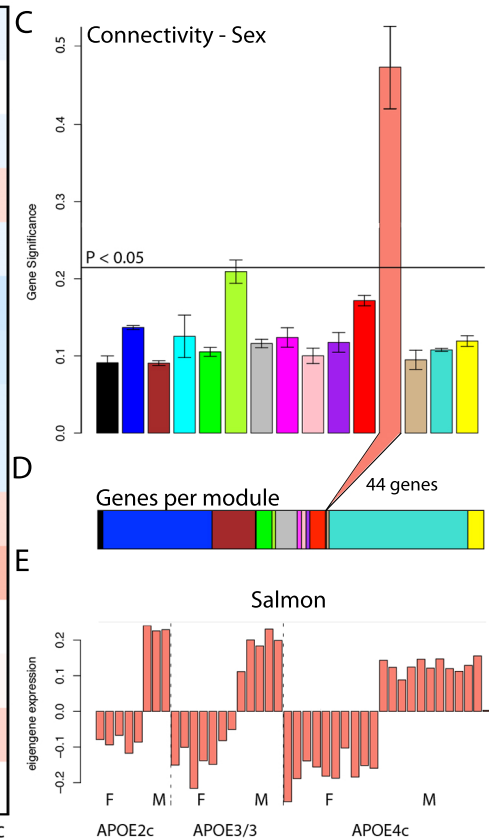

**Supplemental Figure 1**
