# Supplementary material for: APOE2 orchestrated differences in transcriptomic and lipidomic profiles of postmortem AD brain
Source: Springer Nature journal article supplement (doi:10.1186/s13195-019-0558-0), 2019-12-01
Supplement: MOESM3 [file 23189426]

| Cardiolipin (CL) |                                                                                                         | Lyso Phosphatidylethanolamine (LPE) |               |
|------------------|---------------------------------------------------------------------------------------------------------|-------------------------------------|---------------|
| m/z              | lipid species                                                                                           | m/z                                 | lipid species |
| 698.97           | 18:2-18:1-16:1-16:1                                                                                     | 460.28                              | P16:0         |
| 699.98           | 18:1-18:1-16:1-16:1                                                                                     | 476.28                              | 16:0          |
| 702.00           | 18:1-18:1-16:0-16:0, 18:2-18:0-16:0-16:0, 18:1-18:0-16:0-16:1                                           | 486.30                              | P18:1         |
| 710.97           | 20:4-18:1-16:1-16:1, 20:4-18:2-16:1-16:0                                                                | 488.31                              | P18:0         |
| 711.98           | 20:4-18:1-16:1-16:0, 18:2-18:2-18:1-16:1                                                                | 500.28                              | 18:2          |
| 712.99           | 20:3-18:1-16:1-16:0, 18:2-18:1-18:1-16:1                                                                | 502.29                              | 18:1          |
| 714.00           | 20:2-18:1-16:1-16:0, 18:1-18:1-18:1-16:1                                                                | 504.31                              | 18:0          |
| 715.00           | 20:1-18:1-16:1-16:0, 18:1-18:1-18:1-16:0                                                                | 524.28                              | 20:4          |
| 722.97           | 20:4-20:4-16:1-16:0, 20:4-18:2-18:2-16:1                                                                | 548.28                              | 22:6          |
| 723.98           | 20:4-18:2-18:1-16:1                                                                                     |                                     |               |
| 724.99           | 20:4-18:2-18:1-16:0, 20:4-18:1-18:1-16:1                                                                | Acyl Carnitine (CAR)                |               |
| 726.00           | 20:4-18:1-18:1-16:0, 20:3-18:1-18:1-16:1, 20:3-18:1-18:1-16:1                                           | m/z                                 | lipid species |
| 727.00           | 20:3-18:1-18:1-16:0, 20:2-18:1-18:1-16:1                                                                | 370.30                              | 14:1          |
| 728.01           | 20:2-18:1-18:1-16:0, 20:1-18:1-18:1-16:1                                                                | 372.31                              | 14:0          |
| 734.97           | 20:4-20:4-18:2-16:1                                                                                     | 398.33                              | 16:1          |
| 735.98           | 20:4-20:4-18:1-16:1                                                                                     | 400.34                              | 16:0          |
| 736.99           | 20:4-20:4-18:1-16:0, 22:6-18:1-18:1-16:1, 22:6-18:2-18:1-16:0                                           | 424.34                              | 18:2          |
| 738.00           | 20:4-18:2-18:1-18:1, 22:6-18:1-18:1-16:0                                                                | 426.36                              | 18:1          |
| 739.00           | 20:4-18:1-18:1-18:1                                                                                     | 428.37                              | 18:0          |
| 740.01           | 20:4-18:1-18:1-18:0                                                                                     |                                     |               |
| 747.98           | 20:4-20:4-18:2-18:2, 20:4-20:4-20:4-16:0, 22:6-20:4-18:1-16:1, 22:6-22:6-16:0-16:0, 22:6-18:2-18:1-16:0 | Ceramide (CER)                      |               |
| 748.99           | 20:4-20:4-18:2-18:1                                                                                     | m/z                                 | lipid species |
| 750.00           | 20:4-20:4-18:1-18:1                                                                                     | 564.54                              | N18:0         |
| 751.00           | 22:6-18:1-18:1-18:1, 20:4-20:3-18:1-18:1                                                                | 592.57                              | N20:0         |
| 752.01           | 22:5-18:1-18:1-18:1, 20:4-20:2-18:1-18:1                                                                | 620.60                              | N22:0         |
| 760.99           | 22:6-20:4-18:2-18:1                                                                                     | 634.61                              | N23:0         |
| 762.00           | 22:6-20:4-18:1-18:1                                                                                     | 644.60                              | N24:2         |
| 763.00           | 18:2-18:2-20:1-22:6, 18:1-18:2-20:2-22:6                                                                | 646.61                              | N24:1         |
|                  |                                                                                                         | 648.63                              | N24:0         |

Suppl Table 3 - Lipids
