# Supplementary material for: APOE2 orchestrated differences in transcriptomic and lipidomic profiles of postmortem AD brain
Source: Springer Nature journal article supplement (doi:10.1186/s13195-019-0558-0), 2019-12-01
Supplement: MOESM4 [file 23189426]

| Phosphatidylcholine (PC) |                                             |
|--------------------------|---------------------------------------------|
| m/z                      | lipid species                               |
| 710.53                   | D14:0-16:1                                  |
| 712.55                   | D14:0-16:0                                  |
| 724.58                   | P16:0-16:0/A16:0-16:1                       |
| 726.60                   | A16:0-16:0                                  |
| 736.55                   | D16:1-16:1/D14:1-18:1                       |
| 738.56                   | D16:1-16:0/D14:1-18:0                       |
| 740.58                   | D16:0-16:0                                  |
| 746.57                   | P16:0-18:1/A16:0-18:2                       |
| 750.60                   | P16:0-18:1/P18:1-16:0                       |
| 752.61                   | P16:0-18:0/P18:0-16:0/A18:1-16:0/A16:0-18:1 |
| 754.63                   | A16:0-18:0                                  |
| 760.55                   | D14:1-20:3/D16:2-18:2/D14:0-20:4            |
| 762.56                   | D16:1-18:2                                  |
| 764.58                   | D16:0-18:2                                  |
| 766.59                   | D16:0-18:1                                  |
| 768.61                   | D16:0-18:0                                  |
| 778.63                   | P18:0-18:1/P18:1-18:0                       |
| 780.65                   | A18:0-18:1/P18:0-18:0                       |
| 782.66                   | A16:0-20:0                                  |
| 788.58                   | D18:2-18:2/D16:0-20:4                       |
| 790.59                   | D18:1-18:2/D16:0-20:3                       |
| 792.61                   | D18:0-18:2/D18:1-18:1                       |
| 794.63                   | D18:0-18:1                                  |
| 796.64                   | D18:0-18:0                                  |
| 806.66                   | P18:0-20:1/P16:0-22:1                       |
| 808.68                   | P18:0-20:0/P16:0-22:0                       |
| 812.58                   | D16:0-22:6/D18:2-20:4                       |
| 814.59                   | D18:1-20:4/D16:0-22:5                       |
| 816.61                   | D18:2-20:2/D18:0-20:4                       |
| 818.63                   | D18:0-20:3                                  |
| 820.64                   | D18:0-20:2/P18:2-22:6                       |
| 822.66                   | D18:0-20:1/P18:1-22:6                       |
| 838.59                   | D18:1-22:6/D18:2-22:5                       |
| 840.61                   | D18:0-22:6                                  |
| 842.63                   | D18:0-22:5                                  |
| 844.64                   | D18:0-22:4/D20:0-20:4/D20:2-20:2            |
| 876.70                   | D20:0-22:2/D20:2-22:0                       |
| 878.72                   | D20:0-22:1                                  |

| Phosphatidylinositol (PI) |               |
|---------------------------|---------------|
| m/z                       | lipid species |
| 807.50                    | 16:0-16:1     |
| 809.52                    | 16:0-16:0     |
| 861.55                    | 18:0-18:2     |
| 863.56                    | 18:0-18:1     |
| 883.53                    | 18:1-20:4     |
| 885.55                    | 18:0-20:4     |
| 909.55                    | 18:0-22:6     |
| 913.58                    | 18:0-22:4     |

| Phosphatidic acid (PA) |                     |
|------------------------|---------------------|
| m/z                    | lipid species       |
| 647.47                 | 16:0-16:0           |
| 673.48                 | 16:0-18:1           |
| 699.50                 | 18:0-18:2/18:1-18:1 |
| 701.51                 | 18:0-18:1           |

| Phosphatidylserine (PS) |                     |
|-------------------------|---------------------|
| m/z                     | lipid species       |
| 786.53                  | 18:0-18:2           |
| 788.54                  | 18:0-18:1           |
| 810.53                  | 18:0-20:4           |
| 812.54                  | 18:0-20:3           |
| 814.56                  | 18:0-20:2           |
| 816.58                  | 18:0-20:1           |
| 834.53                  | 18:0-22:6           |
| 838.56                  | 20:0-20:4/18:0-22:4 |

| Phosphatidylglycerol (PG) |               |
|---------------------------|---------------|
| m/z                       | lipid species |
| 721.50                    | 16:0-16:0     |
| 747.52                    | 16:0-18:1     |
| 773.53                    | 18:1-18:1     |
| 775.55                    | 18:0-18:1     |
| 777.57                    | 18:0-18:0     |

Suppl Table 4 - Lipids
